# Supplementary material for: BnA.JAZ5 Attenuates Drought Tolerance in Rapeseed through Mediation of ABA–JA Crosstalk
Source: MDPI journal article supplement (doi:10.3390/horticulturae8020131), 2022-01-31
Supplement: s1 [file s1]

**Table S1.** Primers used in this study.

| Primers          | Sequences                    | Usage                              |
|------------------|------------------------------|------------------------------------|
| NPTII-R          | 5'-GACCACCAAGCGAAACAT        | Identification of transgenic lines |
| NPTII-F          | 5'-GGCGATACCGTAAAGCAC        |                                    |
| BnA.JAZ5-2196S   | 5'-GATGGGTTTTTATGATTAG       | <i>BnA.JAZ5</i> cloning            |
| BnA.JAZ5-4180A   | 5'-AAAGTAGAACGGTTTGTGG       |                                    |
| BnA.JAZ5-S1      | 5'-ATGTCAAGAAATGAAGATGGTAAGG | Real-time PCR of <i>BnA.JAZ5</i>   |
| BnA.JAZ5-A804    | 5'-TTATAGCCTAAGTTCGAGATCTTTC |                                    |
| UBC21-F          | 5'-TCCCGAACCGTATCCTCTGC      | Real-time PCR of <i>UBC21</i>      |
| UBC21-R          | 5'-GGTTACCTGAGTCGCAGTTGAG    |                                    |
| BnP5CS-253S      | 5'-CAGAAGCCACAGACTGAACTTG    | Real-time PCR of <i>BnP5CS</i>     |
| BnP5CS-386A      | 5'-AAACTGCTATCAGTCACCAGCA    |                                    |
| BnPLC-145S       | 5'-CTGATCGATGTTTCAGAAGCAAG   | Real-time PCR of <i>BnPLC</i>      |
| BnPLC-245A       | 5'-TCGAGGTGGAGACCGTTACTAT    |                                    |
| BnCYSTM1-S3      | 5'-GAGCCAGTACAATCACAACCA     | Real-time PCR of <i>BnCYSTM1</i>   |
| BnCYSTM1-219A    | 5'-TTAGAAGCAGATGTCCAGGGC     |                                    |
| BnLEA76-S392     | 5'-GAGAAGCCATAAAGCAGAAG      | Real-time PCR of <i>BnLEA76</i>    |
| BnLEA76-641A     | 5'-CCAGTAGTGGTCGTAGTTGT      |                                    |
| BnA.JAZ5-RT-S88  | 5'-GAGAAGGGTAGTTTCGGTAAT     | Real-time PCR of <i>BnA.JAZ5</i>   |
| BnA.JAZ5-RT-243A | 5'-AGAGGGTTCGCCTAAGACA       |                                    |
| BnC.JAZ5-RT-S3   | 5'-GGGCTCTACACCCATCCCTCTT    | Real-time PCR of <i>BnC.JAZ5</i>   |
| BnC.JAZ5-RT-245A | 5'-TTCCCGAAACTACCCTTCTCCT    |                                    |
| BnMYC2-S291      | AGGAGAAGAAGACAAGGCAAAGC      | Real-time PCR of <i>BnMYC2</i>     |
| BnMYC2-561A      | ATCCGACCCATAAACCCAAACTG      |                                    |
| BnABF3-S365      | TGATGAAGGACGATGACGCTG        | Real-time PCR of <i>BnABF3</i>     |
| BnABF3-589A      | TAGGACCAAACCCATTACGAG        |                                    |
